# Supplementary material
Source: publisher figshare collection journal article supplement (https://acs.figshare.com/ndownloader/files/20396214)
Supplement: Supplementary file 1 [file 20396214]

## **SUPPORTING INFORMATION**

**TITLE:** Orientation of Ligand Field for Dangling Manganese in Photosynthetic Oxygen-Evolving Complex of Photosystem II

**AUTHORS:** Hiroyuki Mino<sup>\*</sup> and Hiroki Nagashima<sup>‡</sup>

Division of Material Science, Graduate School of Science, Nagoya University, Furo-cho, Chikusa-ku, 464-8602, Nagoya, Aichi, Japan.

### **Present Addresses**

<sup>‡</sup>Hiroki Nagashima, Department of Chemistry, Graduate School of Science and Engineering, Saitama University, 255 Shimo-Okubo, Sakura-ku, Saitama 338-8570, Japan

**The supporting information containing Figure S1-S8**

### **Corresponding Author**

**\*Hiroyuki Mino, Tel: +81-52-789-2882; Email: [mino@bio.phys.nagoya-u.ac.jp](mailto:mino@bio.phys.nagoya-u.ac.jp)**

## CONTENTS

**Figure S1.** EPR spectra of  $g = 4$  signals in  $S_2$  state and  $S_1$  state of the oriented PS II membranes.

**Figure S2.** The orientation dependence of the  $g = 4$  signal at the angle of the external magnetic field relative to the membrane normal  $n$ .

**Figure S3.** The simulated spectrum and the energy block diagram for  $S = 5/2$  spin state using the single-spin model.

**Figure S4.** The possible orientations of the  $D_X/D_Y/D_Z$  axes relative to the Mn4 in the crystal structures.

**Figure S5.** Stereo views of the possible orientations of the  $D_X/D_Y/D_Z$  axes relative to the ligand fields on Mn1.

**Figure S6.** The EPR simulations using the weak coupling model (QM/MM) and the strong coupling models.

**Figure S7.**  $J$  dependence of the resonant conditions for the strong coupled four-spin model.

**Figure S8.** The simulated  $J$  dependence of the resonant fields in the strong coupled model at Q-band (34 GHz).

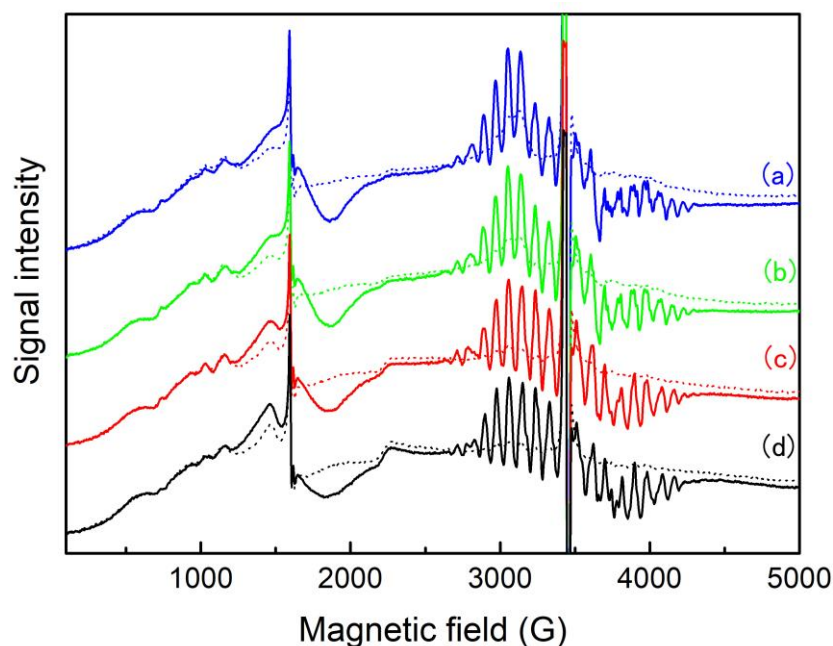

**Figure S1.** EPR spectra of the oriented PS II membranes in (solid line)  $S_2$  state (dotted line)  $S_1$  state measured at the angle of (a)  $0^\circ$ , (b)  $30^\circ$ , (c)  $60^\circ$ , and (d)  $90^\circ$  of the external magnetic field  $\mathbf{B}_0$  relative to the membrane normal  $\mathbf{n}$ . Experimental conditions: microwave frequency, 9.67 GHz; microwave power, 4 mW; modulation frequency, 100 kHz; modulation amplitude, 10 G.

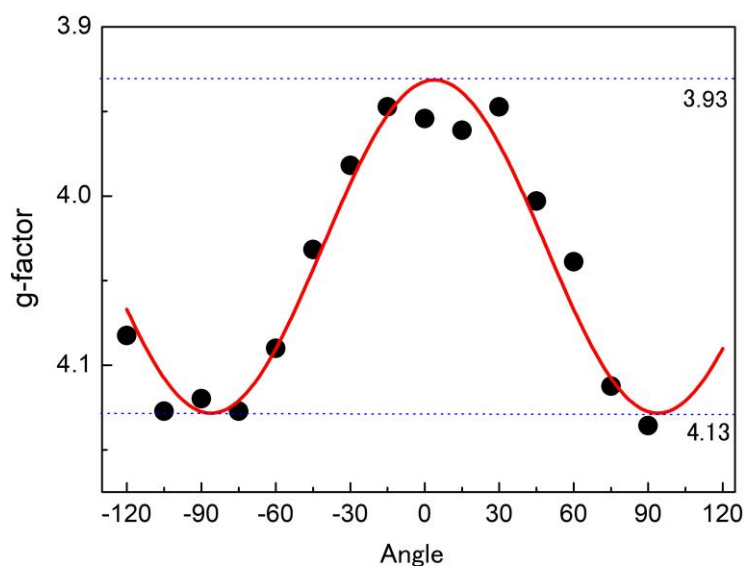

**Figure S2.** The orientation dependence of the  $g$ -values, converted from the resonant fields of the  $g = 4.1$  signal relative to the angle between the external magnetic field  $\mathbf{B}_0$  and the membrane normal  $\mathbf{n}$ . The orientation dependence was fitted by a sine function (solid line). The dotted lines show the maximum and minimum  $g$ -values. Experimental conditions are the same as fig. S1.

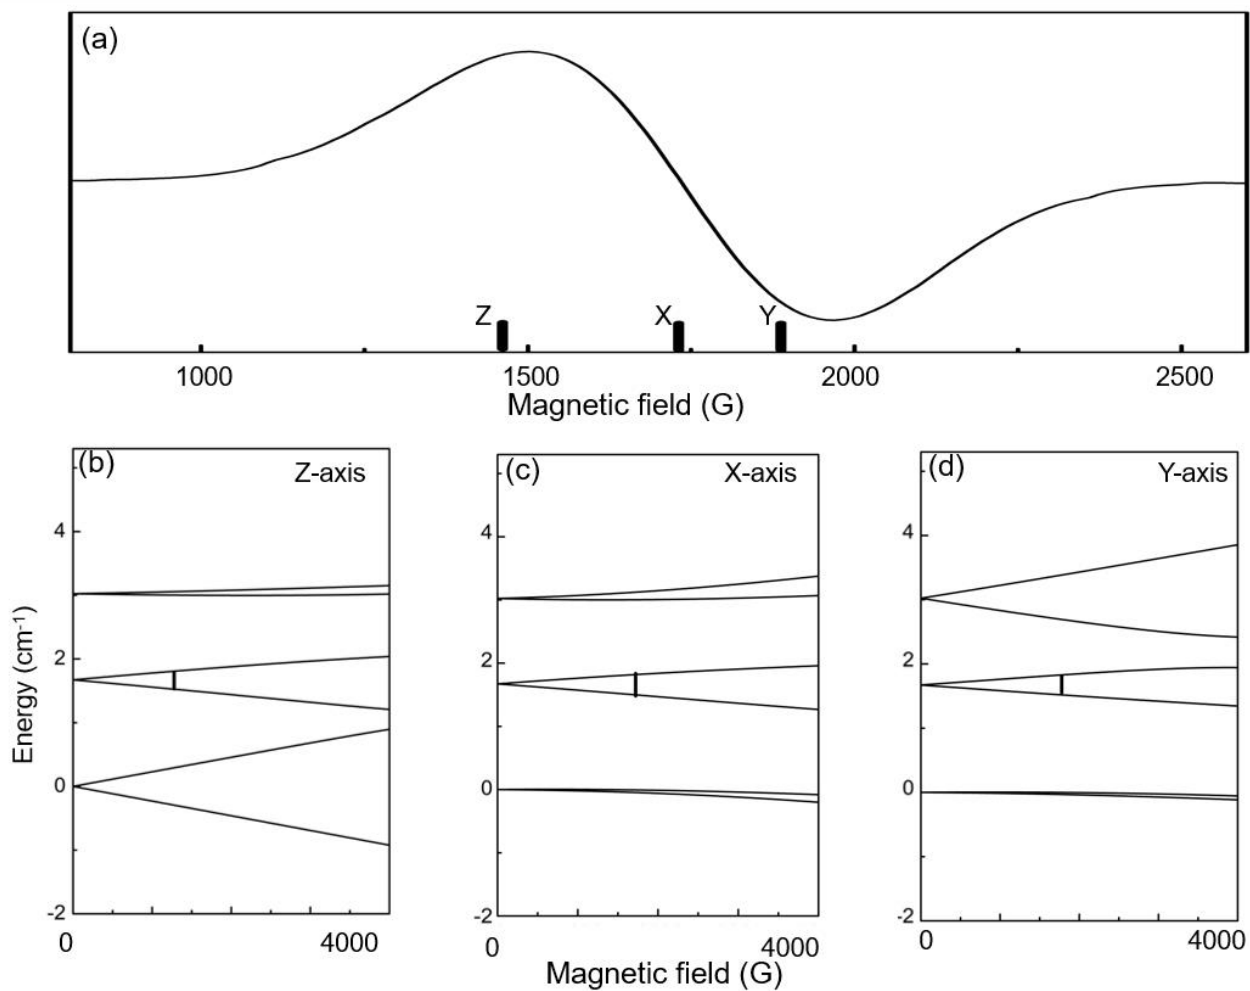

**Figure S3.** (a) The powder pattern of the EPR spectrum for the  $g = 4.1$  signal using the single-spin model. (b-d) The energy block diagrams, where the external field  $\mathbf{B}_0$  is directed along (b)  $D_Z$ -axis, (c)  $D_X$ -axis and (d)  $D_Y$ -axis. The parameters: microwave frequency, 9.67 GHz;  $g = 2$ ;  $\mathbf{S} = 5/2$ ;  $D = -0.455 \text{ cm}^{-1}$ ;  $E/D = 0.25$ .

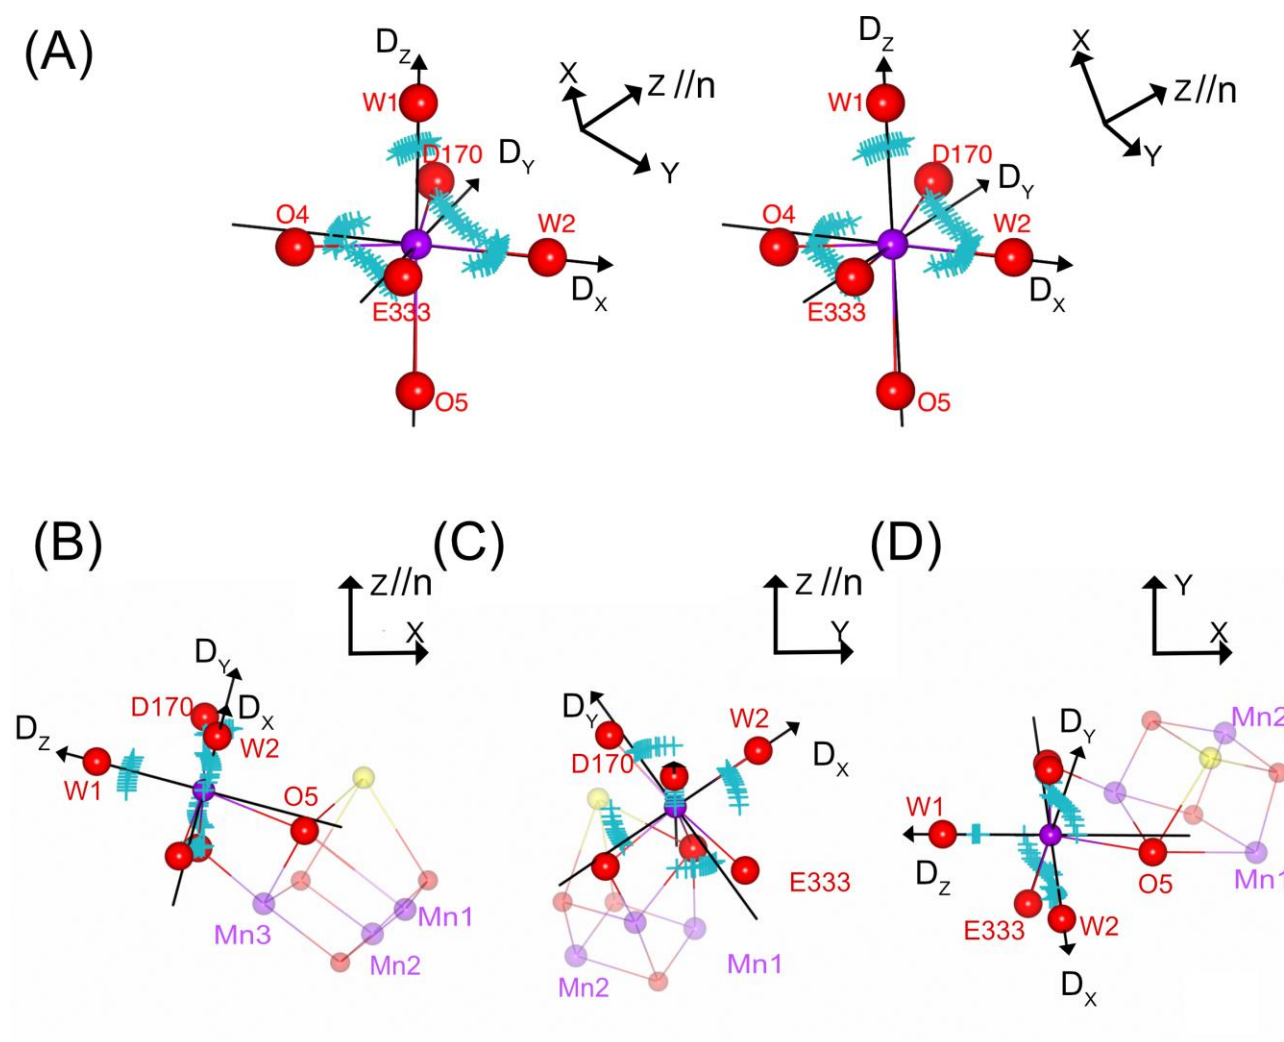

**Figure S4.** The possible orientations of the  $D_X$ / $D_Y$ / $D_Z$  axes relative to the Mn4 in the crystal structures. The Mn4 is located on the origin of the coordinates. The Z-axis is parallel to membrane normal  $n$ . The XY-plane is parallel to membrane plane.  $D_X$  and  $D_Z$  axes are set to the closest direction to Mn4-O(W2) and Mn4-O(W1), respectively. Panel A is stereographic figure, projected to the arbitrary plane. Panels B-D are the projected figures to (B) XZ-, (C) YZ- and (D) XY-planes, respectively. The possible angles for EPR shifts of 70-80 G in the oriented membranes are indicated with the blue cross marks, corresponded to the open circles in fig.3. The red, yellow and purple balls represent O, Ca and Mn, respectively.

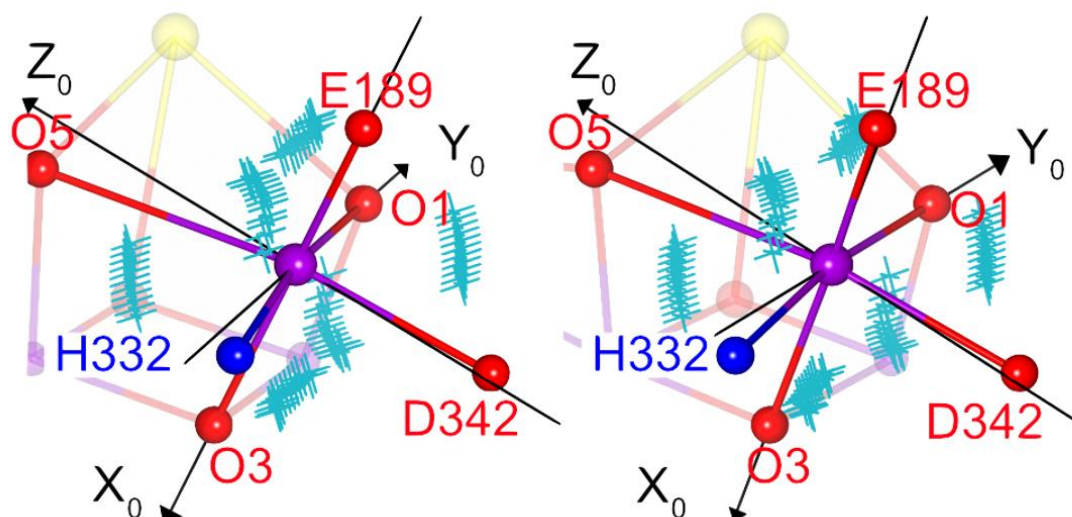

**Figure S5.** Stereo views of the orientations of the  $X_0/Y_0/Z_0$  axes relative to the ligand fields on Mn1. The Mn1 is located on the origin of the coordinates. The axes are set close to Mn1-O3, Mn1-O1 and Mn1-O5, respectively. The possible angles for EPR shifts of 70-80 G in the oriented membranes are indicated with the blue cross marks, corresponded to the open circles in fig.3. The red, yellow and purple balls represent O, Ca and Mn, respectively.

### Four-spin model

For the four coupled manganese model, Hamiltonian is written as followings:

$$\mathcal{H} = \sum_{i=1}^4 g_i \beta \mathbf{S}_i \mathbf{B}_0 + \sum \mathbf{I}_i \cdot \mathbf{A}_i \cdot \mathbf{S}_i + \sum_{i=1}^4 \mathbf{S}_i \cdot \mathbf{D}_i \cdot \mathbf{S}_i - \sum_{i<j} 2J_{ij} \mathbf{S}_i \cdot \mathbf{S}_j \quad (5a)$$

$$\mathbf{S}_{total} = \sum_{i=1}^4 \mathbf{S}_i \quad (5b)$$

, where  $\mathbf{S}_i$  and  $\mathbf{I}_i$  are the operators of electron spin and nuclear spin of the  $i$ -th Mn ion, respectively,  $g_i$  is the  $g$ -factor, and  $\mathbf{A}_i$  is the effective hyperfine tensor of the  $i$ -th ion,  $\mathbf{D}_i$  is the tensor of zero-field splittings.  $J_{ij}$  is the exchange interaction between the  $i$ -th and  $j$ -th ions. Total spin  $\mathbf{S}_{total} = 13/2$  for 1Mn(III)3Mn(IV). For two-spin model, the coupling  $J_{eff}$  was assumed between  $\mathbf{S} = 9/2$  (cubane frame) and  $\mathbf{S} = 2$  (Mn(III)). For four-spin model, the spectral simulations were performed by the diagonalization of the  $320 \times 320$  matrix for spin Hamiltonian using basic set of wavefunctions  $((\mathbf{S}_1 \otimes \mathbf{S}_2) \otimes \mathbf{S}_3) \otimes \mathbf{S}_4$ . In the simulations, Mn1-3 were assumed to be Mn(IV) ( $\mathbf{S} = 3/2$ ), and Mn4 was assumed to be Mn(III) ( $\mathbf{S} = 2$ ). The zero-field splitting term was replaced as followings<sup>1</sup>:

$$d_4 \left[ \mathbf{S}_{4,z}^2 - \frac{1}{3} S_4(S_4 + 1) \right] + e_4 (\mathbf{S}_{4,x}^2 - \mathbf{S}_{4,y}^2). \quad (5c)$$

, where  $d_4$  and  $e_4$  are onsite zero-field splitting parameters for Mn4. For the weak coupling (QM/MM) model, the set of  $J$  couplings is following:  $J_{12}$ : 30.5 cm<sup>-1</sup>,  $J_{13}$ : 13.0 cm<sup>-1</sup>,  $J_{14}$ : 0 cm<sup>-1</sup>,  $J_{23}$ : 35.5 cm<sup>-1</sup>,  $J_{24}$ : 0 cm<sup>-1</sup>,  $J_{34}$ : -7.6 cm<sup>-1</sup> <sup>2</sup>. For the strong coupling models, the set of  $J$  couplings is following:  $J_{12}$ : 200 cm<sup>-1</sup>,  $J_{13}$ : 0 or 200 cm<sup>-1</sup>,  $J_{14}$ : 0 cm<sup>-1</sup>;  $J_{23}$ : 200 cm<sup>-1</sup>;  $J_{24}$ : 0 cm<sup>-1</sup>. If  $J_{14}$  is non-zero, the result is almost the same because the cubane frame is under the strong ferromagnetic couplings. Figure S6 shows the comparison of (a) the QM/MM (weak coupling) model, (b, c) two-spin model and (d-g) the strong coupling models. In (a) the QM/MM model, the low field signal was assigned to the high spin state as  $g = 6$  and  $g = 10$ , and the high field signal was upshifted from the  $g = 4$  by mixing of the weakly excited state. In order to simulate the spectrum of the  $g = 4$  signal for the strong coupling models, larger  $|J_{34}|$ , estimated as  $> \sim 30$  cm<sup>-1</sup>, is required. The  $g = 4$  signal was well reproduced using the onsite zero-field splitting  $d_4 = -3$  to  $-2$  with the strong  $J_{34}$  coupling.

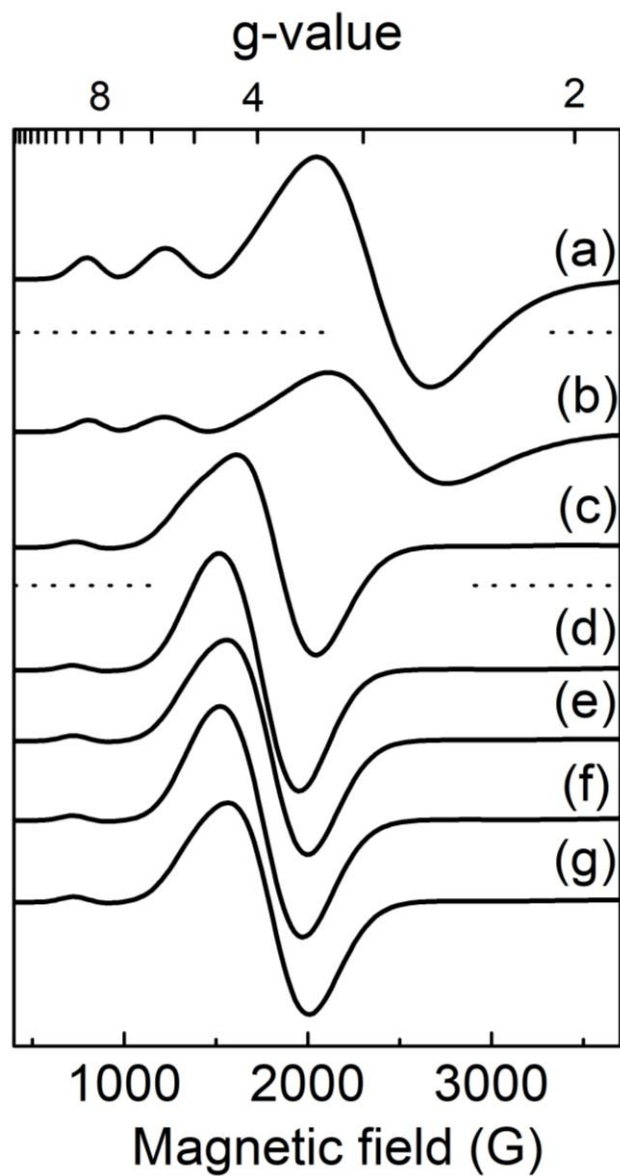

**Figure S6.** The EPR simulations using (a) the weak coupling model (QM/MM), (b, c) two-spin model and (d-g) the strong coupling models. The exchange couplings in four-spin models [ $J_{12}$ ,  $J_{13}$ ,  $J_{14}$ ,  $J_{23}$ ,  $J_{24}$ ,  $J_{34}$ ] : (a) [30.5, 13, 0, 35.5, 0, -7.6], (d) [200, 200, 0, 200, 0, -200], (e) [200, 0, 0, 200, 0, -50], (f) [200, 0, 0, 200, 0, -200], (g) [200, 0, 0, 200, 0, -50]. The exchange couplings  $J_{\text{eff}}$  in two-spin model: (b)  $J_{\text{eff}} = -2.3 \text{ cm}^{-1}$ , (c)  $J_{\text{eff}} = -10 \text{ cm}^{-1}$ . (a-c)  $d4 = -3 \text{ cm}^{-1}$ , (d-g)  $d4 = -2.3 \text{ cm}^{-1}$ ,  $e4/d4 = 0.25$ . Microwave frequency 9.67 GHz; Gaussian linewidth, 350 G.



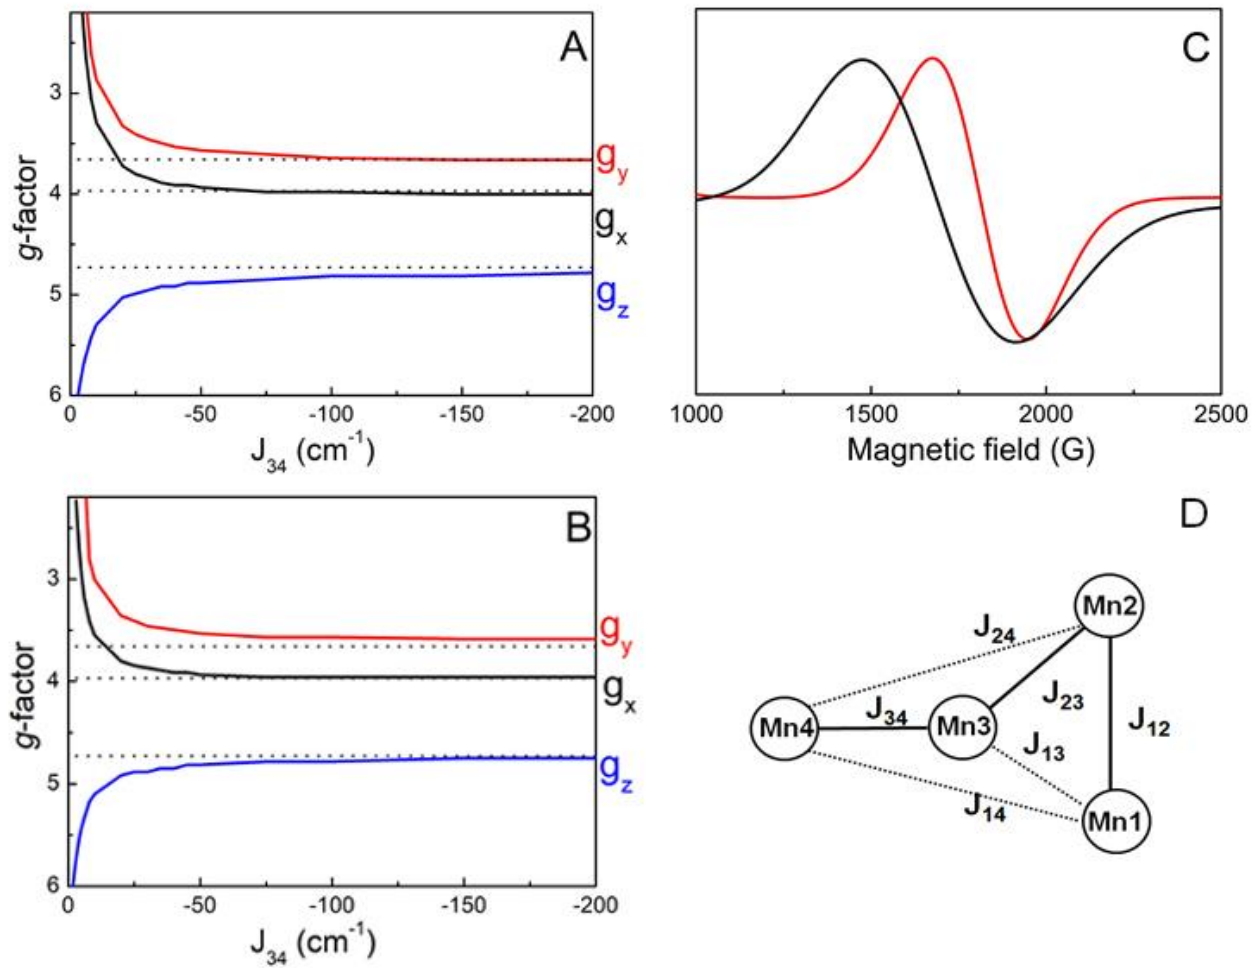

**Figure S7.** (A, B)  $J$  dependence of the resonant conditions for the strongly coupled four-spin model. The parameters:  $J_{12}$ : 200  $\text{cm}^{-1}$ ,  $J_{13}$ : 0  $\text{cm}^{-1}$ ,  $J_{14}$ : 0  $\text{cm}^{-1}$ ,  $J_{23}$ : 200  $\text{cm}^{-1}$ ,  $J_{24}$ : 0  $\text{cm}^{-1}$ . (A):  $d4$ , -2  $\text{cm}^{-1}$ ;  $e4/d4 = 0.25$ . (B):  $d4$ , -3  $\text{cm}^{-1}$ ;  $e4/d4 = 0.25$ . The solid lines show the resonant fields along each axis. The dotted lines show the resonant condition in the case of the single-spin model for  $S = 5/2$  (Figure S3). (C) The simulated spectra for the oriented sample at (red)  $0^\circ$  and (black)  $90^\circ$  using the parameters of  $d4 = -2.3 \text{ cm}^{-1}$ ,  $e4/d4 = 0.25$  and  $J_{34} = -50 \text{ cm}^{-1}$ . The other conditions are the same as the simulated spectrum in the single-spin model. (D) The scheme for the set of the exchange couplings for the four-spin model. Microwave frequency, 9.67 GHz.

Haddy et al. observed the  $g = 3.14$  and  $4.6$  signals in Q-band EPR<sup>3</sup>. The  $g = 3.14$  signal was assigned to the  $\pm 3/2$  transition along the  $x$ -axis for  $S = 5/2$ . The  $g = 4.6$  signal was tentatively assigned to another transitions within  $S = 5/2$ <sup>3</sup>. The Q-band spectrum was well reproduced using the onsite zero-field splitting  $d_4 = -2.3 \text{ cm}^{-1}$  in the strong coupling model (Figure S8).

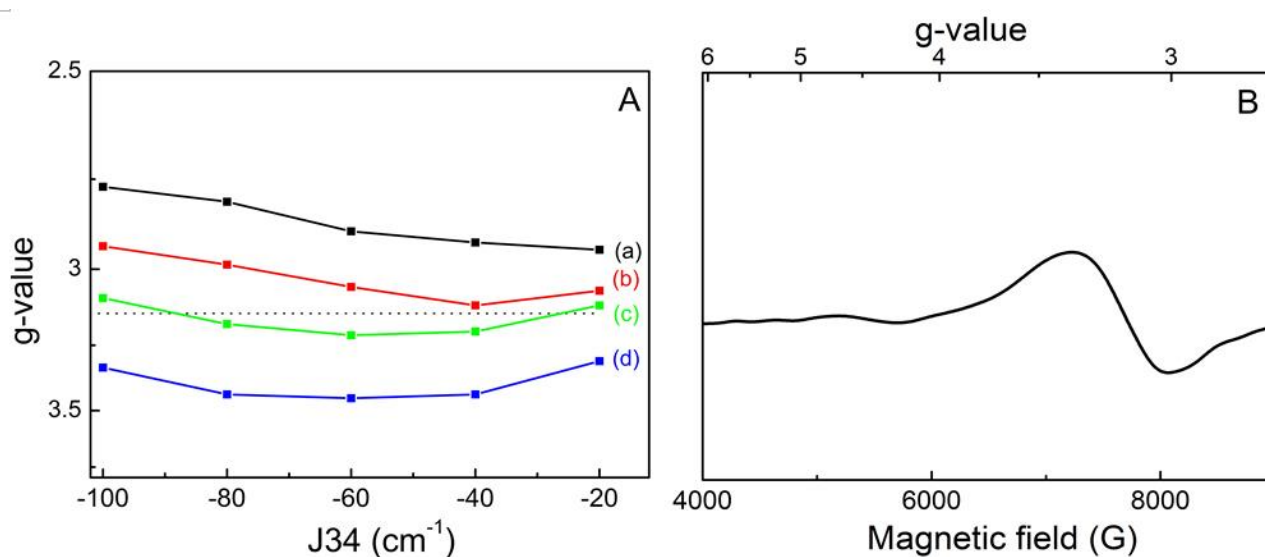

**Figure S8.** (A) The simulated  $J$  dependence of the resonant fields in the strong coupled model at Q-band (34 GHz). The parameter set was used as:  $J_{12}$ :  $200 \text{ cm}^{-1}$ ,  $J_{13}$ :  $0 \text{ cm}^{-1}$ ,  $J_{14}$ :  $0 \text{ cm}^{-1}$ ,  $J_{23}$ :  $200 \text{ cm}^{-1}$ ,  $J_{24}$ :  $0 \text{ cm}^{-1}$ , and  $e_4/d_4 = 0.25$ ; (a)  $d_4$ ,  $-2.0 \text{ cm}^{-1}$ ; (b)  $d_4$ ,  $-2.2 \text{ cm}^{-1}$ ; (c)  $d_4$ ,  $-2.4 \text{ cm}^{-1}$ ; (d)  $d_4$ ,  $-3 \text{ cm}^{-1}$ . The dotted line indicates  $g = 3.14$ <sup>3</sup>. (B) The simulated EPR spectrum using  $d_4 = -2.3 \text{ cm}^{-1}$ . The parameters are the same as (A) except for  $J_{34} = -50 \text{ cm}^{-1}$ .

## References

- (1) Cox, N.; Ames, W.; Epel, B.; Kulik, L. V.; Rapatskiy, L.; Neese, F.; Messinger, J.; Wieghardt, K.; Lubitz, W. Electronic Structure of a Weakly Antiferromagnetically Coupled  $\text{Mn}^{\text{II}}\text{Mn}^{\text{III}}$  Model Relevant to Manganese Proteins: A Combined EPR,  $^{55}\text{Mn}$ -ENDOR, and DFT Study. *Inorg. Chem.* **2011**, *50*, 8238-8251.
- (2) Pantazis, D. A.; Ames, W.; Cox, N.; Lubitz, W.; Neese, F. Two interconvertible structures that explain the spectroscopic properties of the oxygen-evolving complex of photosystem II in the  $\text{S}_2$  state. *Angew. Chem., Int. Ed.* **2012**, *51*, 9935-9940.
- (3) Haddy, A.; Lakshmi, K. V.; Brudvig, G. W.; Frank, H. A. Q-band EPR of the  $\text{S}_2$  state of Photosystem II confirms an  $S=5/2$  origin of the X-band  $g=4.1$  signal. *Biophys. J.* **2004**, *87*, 2885-2896.
